# Supplementary material for: Coursing hyenas and stalking lions: The potential for inter- and intraspecific interactions
Source: PLOS journal article supplement (doi:10.1371/journal.pone.0265054), 2023-02-03
Supplement: S8 (10.1371/journal.pone.0265054.s008) [file journal.pone.0265054.s008]

**S6 Table. Statistical results of the distances between competitor core areas and home range boundaries.** *T*-tests comparing the distances between the center of individual core areas versus the competitors' home range boundary in the Etosha National Park, Namibia (ENP) and the Chobe National Park and Linyanti Conservancy, Botswana (CNP). An asterisk denotes significance at the alpha level with \* < 0.05, and \*\*\* < 0.001.

| Region | Measuring from center of core area to ... | Distance (m)        |                                | Significance |
|--------|-------------------------------------------|---------------------|--------------------------------|--------------|
| ENP    | Lion core – Lion core                     | 41355.74 ± 21665.05 | $t = 4.18, df = 18, p < 0.001$ | ***          |
|        | Lion core – Lion boundary                 | 25375.28 ± 18970.48 |                                |              |
|        | Hyena core – Hyena core                   | 53648.11 ± 26885.53 | $t = 2.52, df = 14, p < 0.05$  | *            |
|        | Hyena core – Hyena boundary               | 33676.46 ± 22906.57 |                                |              |
|        | Lion core – Hyena core                    | 44238.06 ± 28973.78 | $t = 6.46, df = 17, p < 0.001$ | ***          |
|        | Lion core – Hyena boundary                | 25309.90 ± 22395.97 |                                |              |
|        | Hyena core – Lion core                    | 44238.06 ± 23381.01 | $t = 1.66, df = 14, p > 0.05$  |              |
|        | Hyena core – Lion boundary                | 29360.33 ± 20599.76 |                                |              |
|        |                                           |                     |                                |              |
| CNP    | Lion core – Lion core                     | 62568.75 ± 48970.95 | $t = 5.15, df = 9, p < 0.001$  | ***          |
|        | Lion core – Lion boundary                 | 50034.22 ± 43051.36 |                                |              |
|        | Hyena core – Hyena core                   | 67787.71 ± 43125.97 | $t = 1.48, df = 7, p > 0.05$   |              |
|        | Hyena core – Hyena boundary               | 55524.29 ± 45903.21 |                                |              |
|        | Lion core – Hyena core                    | 55793.54 ± 47189.24 | $t = 2.83, df = 6, p < 0.05$   | *            |
|        | Lion core – Hyena boundary                | 44413.01 ± 46900.07 |                                |              |
|        | Hyena core – Lion core                    | 55793.54 ± 46476.41 | $t = 2.72, df = 8, p < 0.05$   | *            |
|        | Hyena core – Lion boundary                | 42041.61 ± 41893.09 |                                |              |
|        |                                           |                     |                                |              |
