# Supplementary material for: Coursing hyenas and stalking lions: The potential for inter- and intraspecific interactions
Source: PLOS journal article supplement (doi:10.1371/journal.pone.0265054), 2023-02-03
Supplement: S12 (10.1371/journal.pone.0265054.s012) [file journal.pone.0265054.s012]

**S10 Table. Lion and spotted hyena movement metrics according to low, medium, and high body condition scores.** Speed (m/s) and path tortuosity (radian) of lions and spotted hyenas during nocturnal (30min fixes) and dusk/dawn (5min fixes) periods from the Etosha National Park, Namibia, the Chobe National Park, Linyanti Conservancy, and the NG32 concession of the Okavango Delta<sup>†</sup>, Botswana. Values are indicated in means  $\pm$  standard deviations. Body conditions of individuals were scored from spinal palpations of immobilized individuals during capture events.

<sup>†</sup>No spotted hyenas were collared from the Okavango Delta, Botswana.

| Period            | BCS        | Speed (m/s)      |                  |                  |                  | Tortuosity        |                   |                   |                   |
|-------------------|------------|------------------|------------------|------------------|------------------|-------------------|-------------------|-------------------|-------------------|
|                   |            | Lion             | Male lion        | Female lion      | Spotted Hyena    | Lion              | Male lion         | Female lion       | Spotted Hyena     |
| Nocturnal periods | Low BCS    | 0.195 $\pm$ 0.26 | 0.221 $\pm$ 0.31 | 0.181 $\pm$ 0.25 | -                | -0.016 $\pm$ 1.86 | 0.052 $\pm$ 1.66  | -0.050 $\pm$ 1.89 | -                 |
|                   | Medium BCS | 0.153 $\pm$ 0.23 | 0.195 $\pm$ 0.28 | 0.136 $\pm$ 0.22 | 0.328 $\pm$ 0.36 | 0.044 $\pm$ 2.28  | 0.042 $\pm$ 1.81  | 0.044 $\pm$ 2.34  | 0.043 $\pm$ 1.83  |
|                   | High BCS   | 0.145 $\pm$ 0.22 | 0.108 $\pm$ 0.20 | 0.169 $\pm$ 0.24 | 0.377 $\pm$ 0.45 | 0.081 $\pm$ 2.37  | 0.095 $\pm$ 2.46  | 0.068 $\pm$ 2.02  | -0.031 $\pm$ 1.60 |
| Dusk/dawn periods | Low BCS    | 0.217 $\pm$ 0.35 | 0.253 $\pm$ 0.39 | 0.200 $\pm$ 0.34 | -                | -0.023 $\pm$ 2.29 | 0.008 $\pm$ 1.91  | -0.038 $\pm$ 2.34 | -                 |
|                   | Medium BCS | 0.153 $\pm$ 0.25 | 0.220 $\pm$ 0.35 | 0.134 $\pm$ 0.24 | 0.393 $\pm$ 0.46 | 0.141 $\pm$ 2.34  | -0.145 $\pm$ 2.41 | 0.284 $\pm$ 2.33  | 0.015 $\pm$ 1.50  |
|                   | High BCS   | 0.173 $\pm$ 0.28 | 0.142 $\pm$ 0.27 | 0.205 $\pm$ 0.32 | 0.433 $\pm$ 0.57 | 0.037 $\pm$ 1.87  | 3.067 $\pm$ 1.82  | -0.000 $\pm$ 2.30 | -0.007 $\pm$ 1.44 |
