# Supplementary material for: Coursing hyenas and stalking lions: The potential for inter- and intraspecific interactions
Source: PLOS journal article supplement (doi:10.1371/journal.pone.0265054), 2023-02-03
Supplement: S33 (10.1371/journal.pone.0265054.s033) [file journal.pone.0265054.s033]

GO-33869

TJ-33870

NE-33871

SA-33872

AU-33873

OM-33874

SU-33951

WO-34310

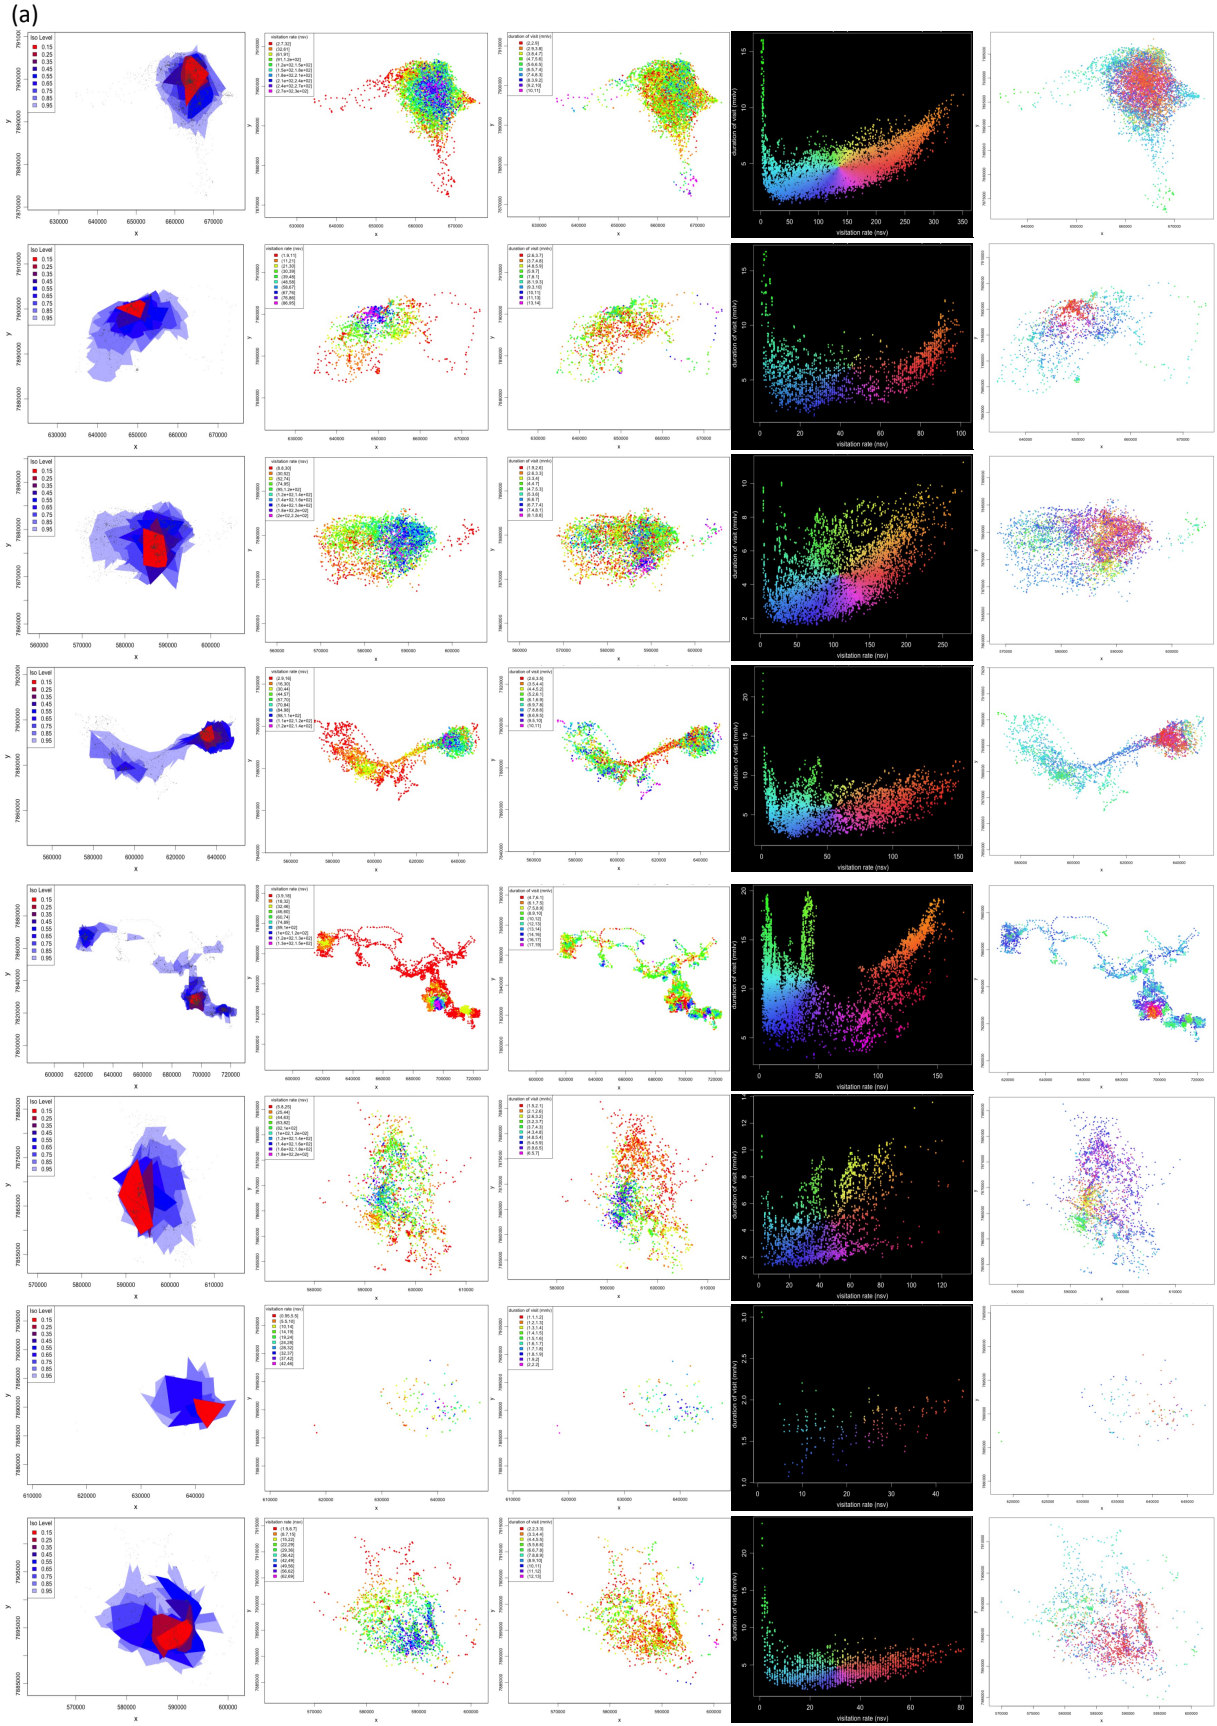

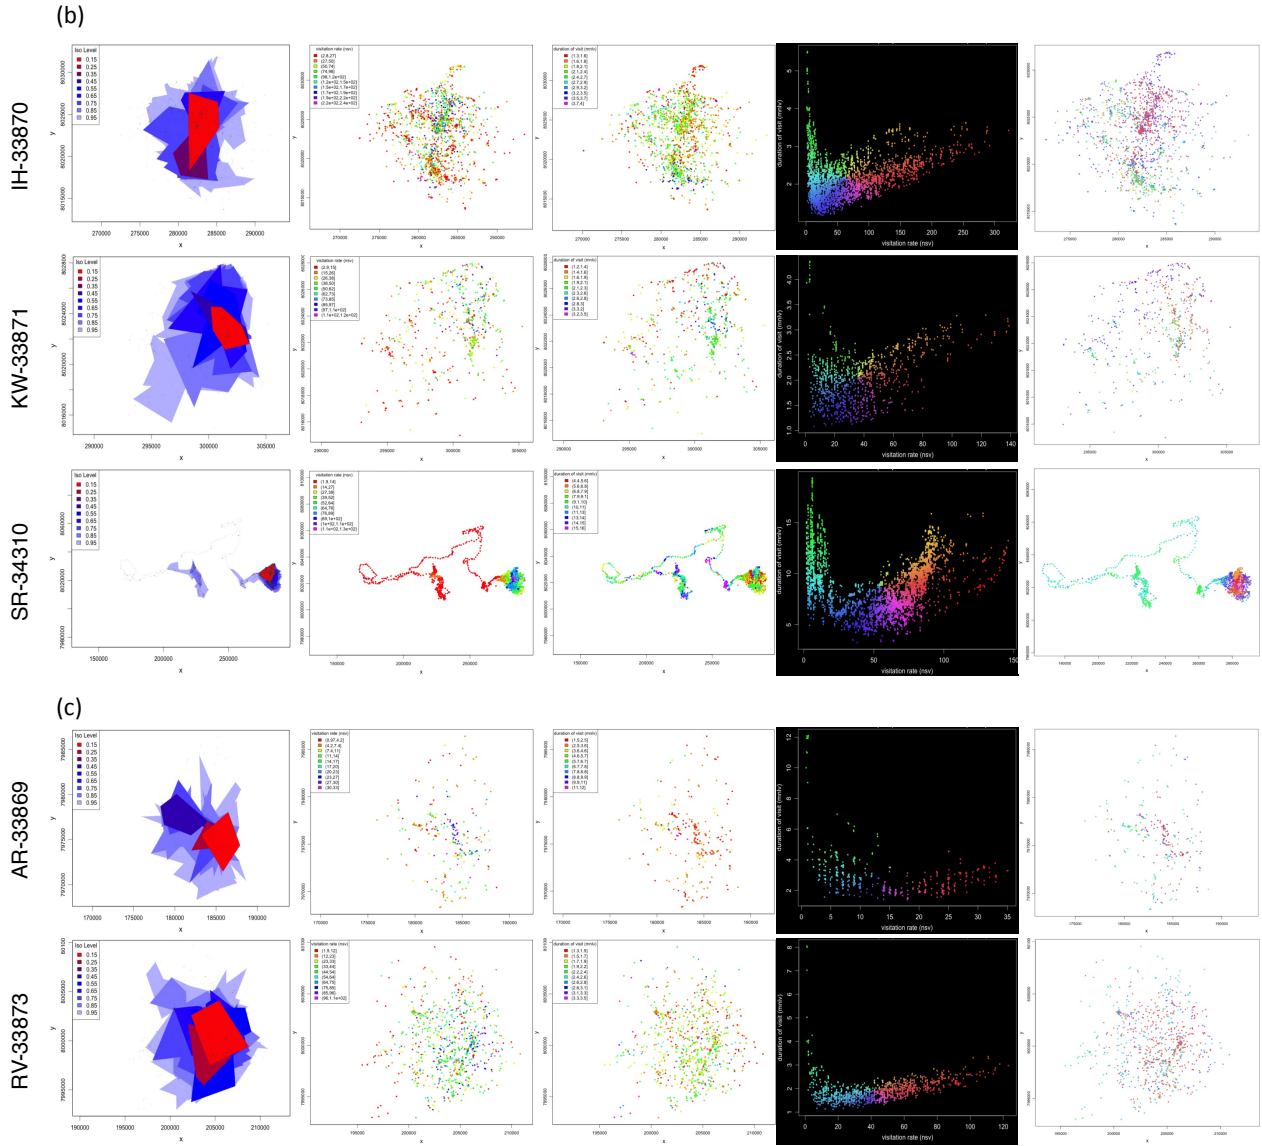

**S17 Fig. Spotted hyena revisitation and duration (RD) space plots.** Time-use constructs of spotted hyena individuals from the (a) Etosha National Park, Namibia; (b) Chobe National Park; and (c) Linyanti Conservancy, Botswana. Unique identifiers are depicted vertically on the left of each row of figures.  $\alpha$ -LoCoH hulls of individual's utilization distributions (far left). Hull parent points coloured by visitation rate (nsv, number of separate visits; second from left), and duration of visit (mnlv, mean number of locations in the hull per visit; third from left). RD space scatterplots (second from right) with X-axis = visitation rate (nsv), and Y-axis = duration of visit (mnlv), provide a legend for revisitation/duration (RD) values for the map (far right). Points in the RD space have been jiggled to better see point density, and each point represents a hull. Points on the maps are coloured by their location in the RD space. Separate visits are defined by an inter-visit gap period  $\geq 12$  hours. Hulls were created using the adaptive method. Duplicate points are offset by 1 map unit.
